# Supplementary material for: National Trends in Heart Donor Usage Rates: Are We Efficiently Transplanting More Hearts?
Source: PubMed Central journal article supplement — J Am Heart Assoc. 2021 Jul 28;10(15):e019655. doi: 10.1161/JAHA.120.019655 (PMC8475695; doi:10.1161/jaha.120.019655), 2021-07-28
Supplement: JAH3-10-e019655-s001.pdf [file JAH3-10-e019655-s001.pdf]

# **SUPPLEMENTAL MATERIAL**

**Figure S1. Donor Heart Disposition over Time by Region.**

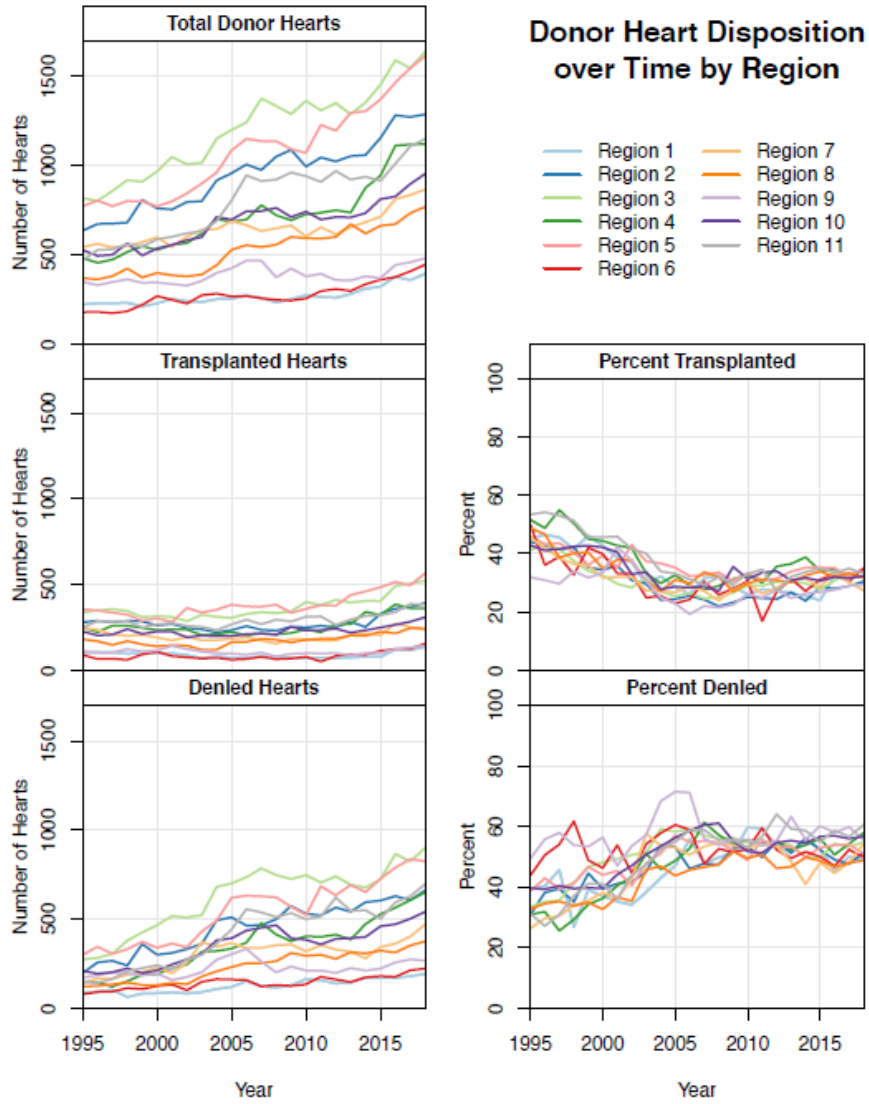

Graphs examining differences between 11 UNOS regions in both number and percentage of total donor heart offers, transplanted and declined hearts from 1995 to 2018. The left panel displays total donor hearts, total transplanted hearts, and total denied hearts per UNOS region. The right panel shows the percent transplanted and percent denied across different UNOS regions.

**Figure S2. Donor Heart Disposition over Time by OPO Size.**

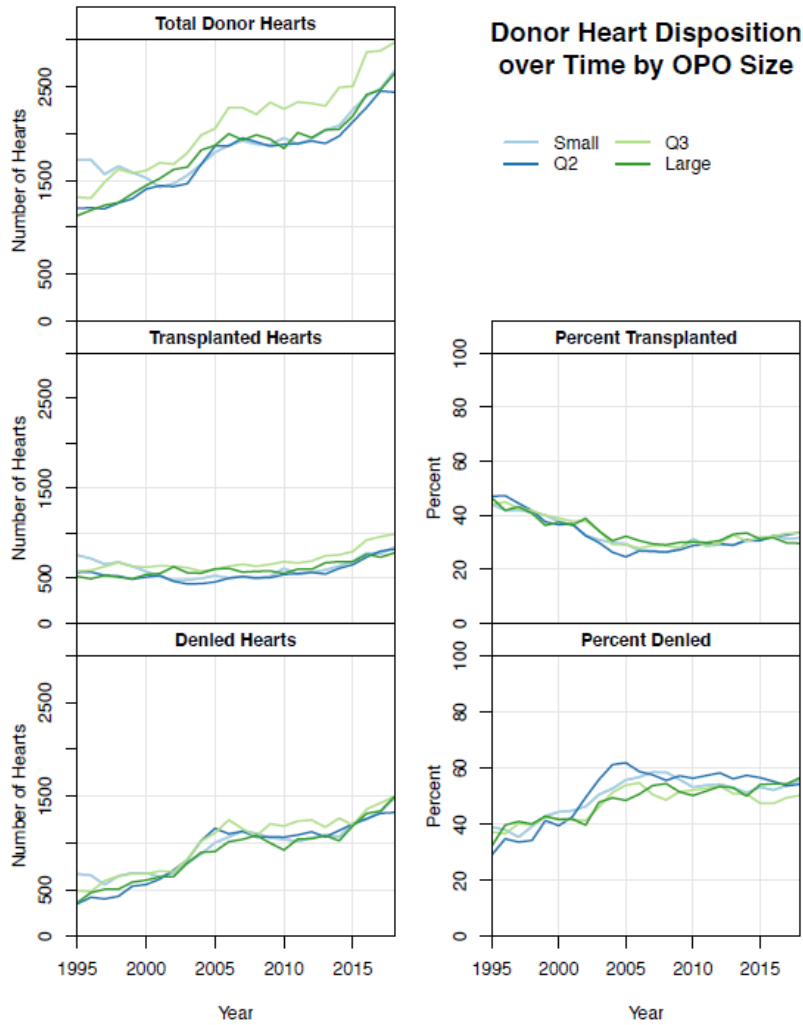

Graphs examining donor trends according to OPO (organ procurement organization) size (divided by quartiles: Small, Q2, Q3, Large) from 1995 to 2018. The left panel displays total donor hearts, total transplanted hearts, and total denied hearts by OPO size. The right panel represents the percentage of donor hearts transplanted per OPO size. The light blue line represents small OPO size, dark blue line represents Quartile 2 OPO size, light green line represents Quartile 3 OPO size, and dark green line represents large OPO size.
